# Supplementary material for: Prevalence of hepatitis B virus and hepatitis C virus infection in patients with systemic lupus erythematosus: a systematic review and meta-analysis
Source: PubMed Central journal article supplement (PMC5731969; doi:10.18632/oncotarget.22261), 2017-11-01
Supplement: oncotarget-08-102437-s001.pdf [file oncotarget-08-102437-s001.pdf]

# Prevalence of hepatitis B virus and hepatitis C virus infection in patients with systemic lupus erythematosus: a systematic review and meta-analysis

## SUPPLEMENTARY MATERIALS

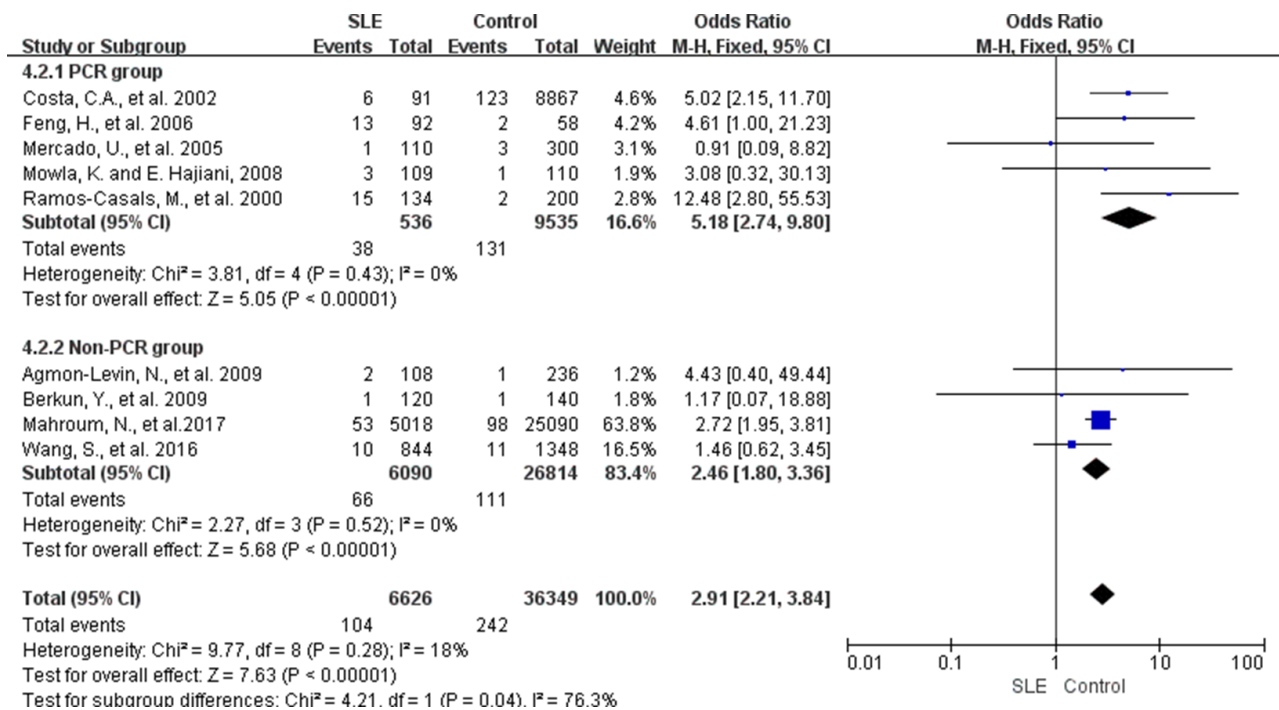

**Supplementary Figure 1: Subgroup analysis of the prevalence rate for HCV in SLE patients and controls.** Forest plot shows the prevalence rate for HCV in SLE patients and controls, OR, odds ratio; CI, confidence Interval.

**Supplementary Table 1: Sensitivity analysis of HBcAb positive rate in SLE patients by omitting each study at a time**

| <b>Excluded Study</b>   | <b>OR (95% CI)</b> | <b>I<sup>2</sup></b> | <b>P</b> |
|-------------------------|--------------------|----------------------|----------|
| Wang F, et al. 2016     | 0.40 (0.31–0.50)   | 0%                   | 0.56     |
| Watanabe R, et al. 2014 | 0.29 (0.19–0.44)   | 50%                  | 0.08     |
| Ram M, et al. 2008      | 0.33 (0.23–0.49)   | 59%                  | 0.03     |
| Berkun Y, et al. 2009   | 0.33 (0.23–0.48)   | 59%                  | 0.03     |
| Lu CL, et al. 1997      | 0.32 (0.20–0.51)   | 60%                  | 0.03     |
| Wu CX, et al. 2015      | 0.29 (0.19–0.45)   | 54%                  | 0.06     |
| Qiu N, et al. 2001      | 0.31 (0.21–0.47)   | 60%                  | 0.03     |

**Supplementary Table 2: Sensitivity analysis of HCV positive rate in SLE patients by omitting each study at a time**

| <b>Excluded Study</b>         | <b>OR (95% CI)</b> | <b>I<sup>2</sup></b> | <b>P</b> |
|-------------------------------|--------------------|----------------------|----------|
| Feng H, et al. 2006           | 2.84 (2.15–3.76)   | 25%                  | 0.23     |
| Mahroum N, et al. 2017        | 3.25 (2.02–5.25)   | 26%                  | 0.22     |
| Ramos-Casals M, et al. 2000   | 2.64 (1.98–3.51)   | 0%                   | 0.54     |
| Agmon-Levin N, et al. 2009    | 2.90 (2.20–3.82)   | 27%                  | 0.21     |
| Mercado U, et al. 2005        | 2.98 (2.26–3.93)   | 20%                  | 0.27     |
| Wang S, et al. 2016           | 3.20 (2.40–4.28)   | 2%                   | 0.41     |
| Berkun Y, et al. 2009         | 2.95 (2.24–3.88)   | 25%                  | 0.23     |
| Mowla K. and E. Hajjani, 2008 | 2.91 (2.21–3.84)   | 28%                  | 0.20     |
| Costa CA, et al. 2002         | 2.81 (2.10–3.75)   | 25%                  | 0.24     |
